# Supplementary material
Source: PubMed Central journal article supplement (PMC2994976)
Supplement: NIHMS247579-supplement-1.pdf [file NIHMS247579-supplement-1.pdf]

## Supplementary Figure 1. The effect of ROCK inhibitors on cellular adhesion.

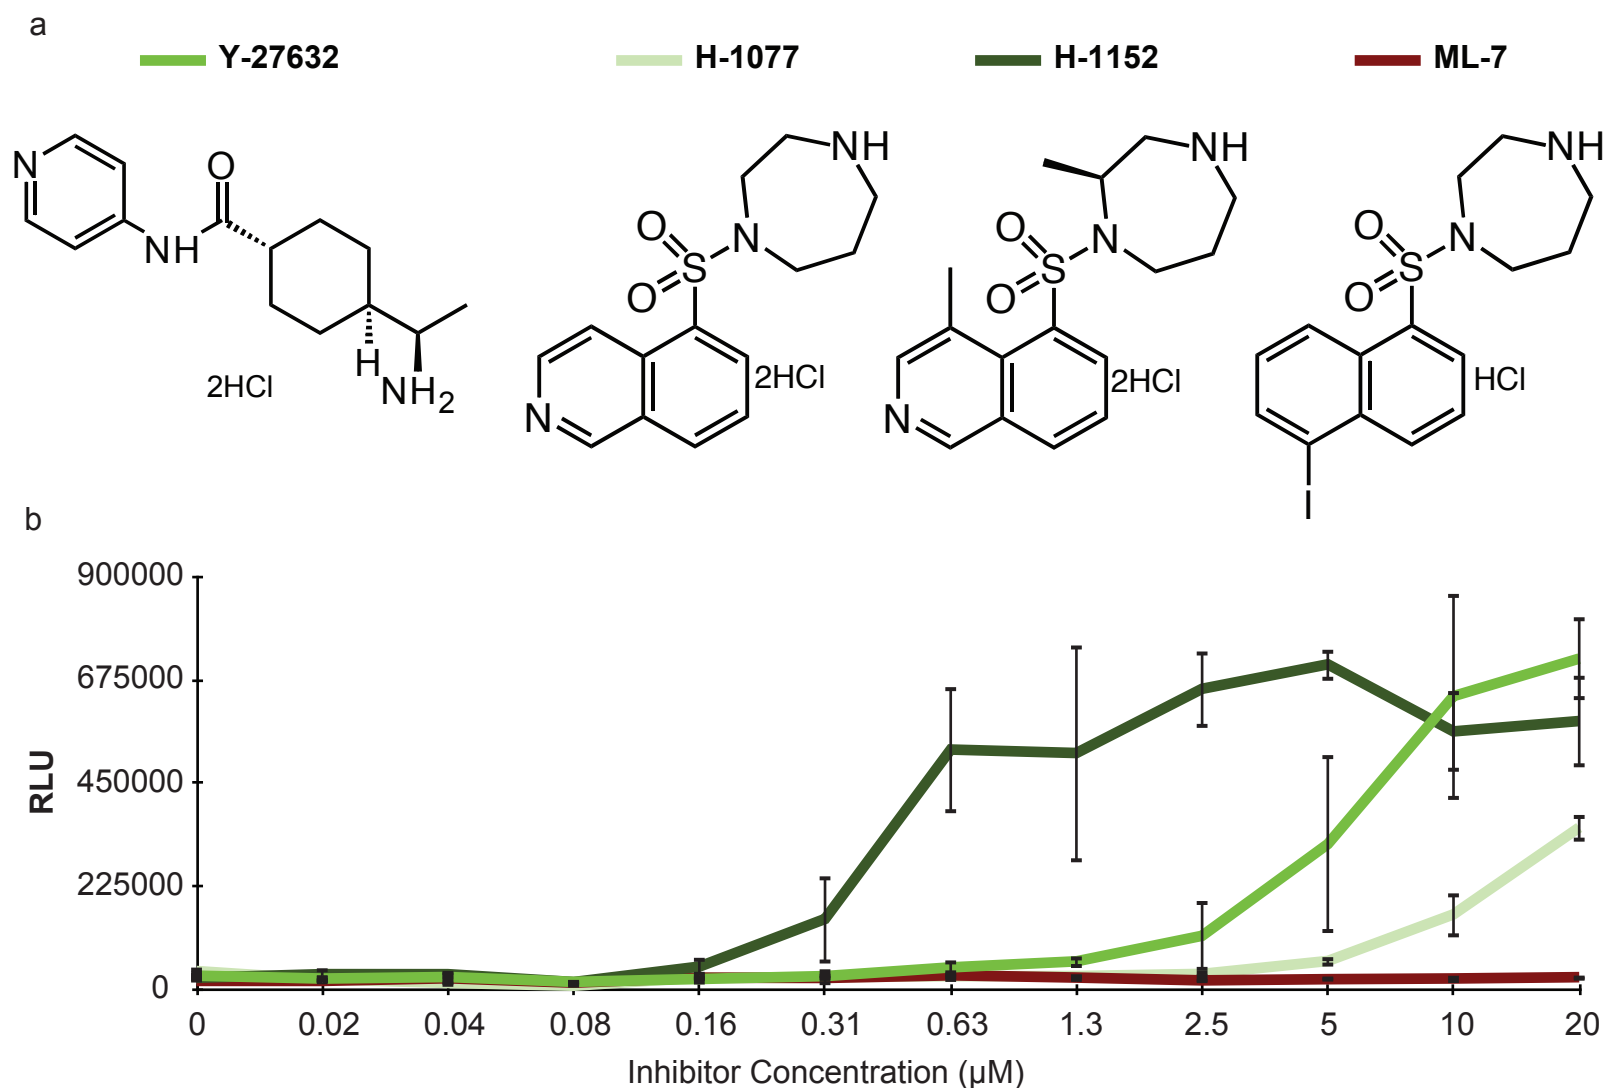

**Supplementary Figure 1.** The effect of ROCK inhibitors on cellular adhesion. (a) Structures of inhibitors tested. These compounds vary in their ROCK inhibitory potency (Y-27632  $K_i=0.14$   $\mu\text{M}$ , H-1077  $K_i=0.33$   $\mu\text{M}$ , and H-1152  $K_i=0.0016$ ) (1). To control for off-target effects, the structurally similar myosin light chain kinase inhibitor ML-7 was employed. This compound has no reported activity against ROCK. (b) Human ES cells (H14) were dissociated and applied to streptavidin-coated surfaces presenting biotinylated GKKQRFHRNRKG in the presence of an inhibitor (Y-27632, HA-1077, H-1152, or ML-7) at varying concentrations. After 12 hours, surfaces were washed, and the cells were lysed in RIPA buffer containing 10% Cell Titer Glo (Promega), which is a homogenous and sensitive method to determine the number of viable cells in culture based on the presence of ATP. The luminescence was measured on an Ultra 384 plate reader from Tecan. Data represent the average of three wells  $\pm$  the standard deviation. As the concentration of inhibitor increased, more cells attached to the surface. In the absence of inhibitor or in the presence of ML-7, very few cells attached to the surface.

1. Yasuharu, S. (2003) New Aspects of Neurotransmitter Release and Exocytosis: Rho-Kinase-Dependent Myristoylated Alanine-Rich C-Kinase Substrate Phosphorylation and Regulation of Neurofilament Structure in Neuronal Cells. *J Pharmacol Sci* 93(1):35-40.

**Supplementary Figure 2.** Treatment of hES cells with enzymes that hydrolyze GAGs inhibits adhesion to surfaces presenting the heparin-binding peptide GKKQRFHRNRKG.

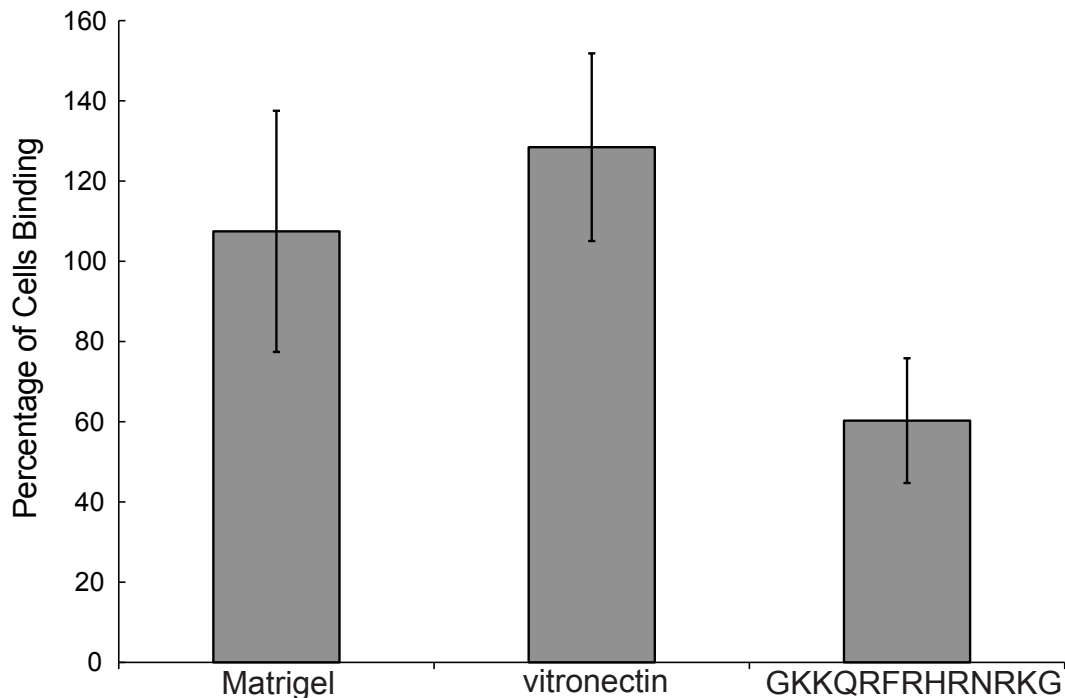

**Supplementary Figure 2.** Treatment of hES cells with enzymes that hydrolyze GAGs inhibits adhesion to surfaces presenting the heparin-binding peptide GKKQRFHRNRKG. Human ES cells (H9) cultured on Matrigel were dissociated using an enzyme-free buffer. Cells were resuspended in DMEM/F12, or DMEM/F12 supplemented with 2 units/mL chondroitinase ABC. Cells were incubated for 1 hour in suspension at 37 °C. Subsequently, cells were seeded on to Matrigel-coated surfaces, recombinant vitronectin-coated surfaces, or SAMs presenting the peptide GKKQRFHRNRKG at a 5% surface density. After 1 hour, surfaces were washed and the cells were lysed. The cell lysate was used to approximate the cell number using Cell Titer Glo (Promega). Percentage of cells binding represents the mean luminescence of the cell lysates plated in the presence of chondroitinase ABC divided by the mean luminescence of cell lysates for the untreated cells  $\pm$  the standard deviation.

### Supplementary Figure 3. Growth characteristics of hES cells cultured on natural and synthetic substrata.

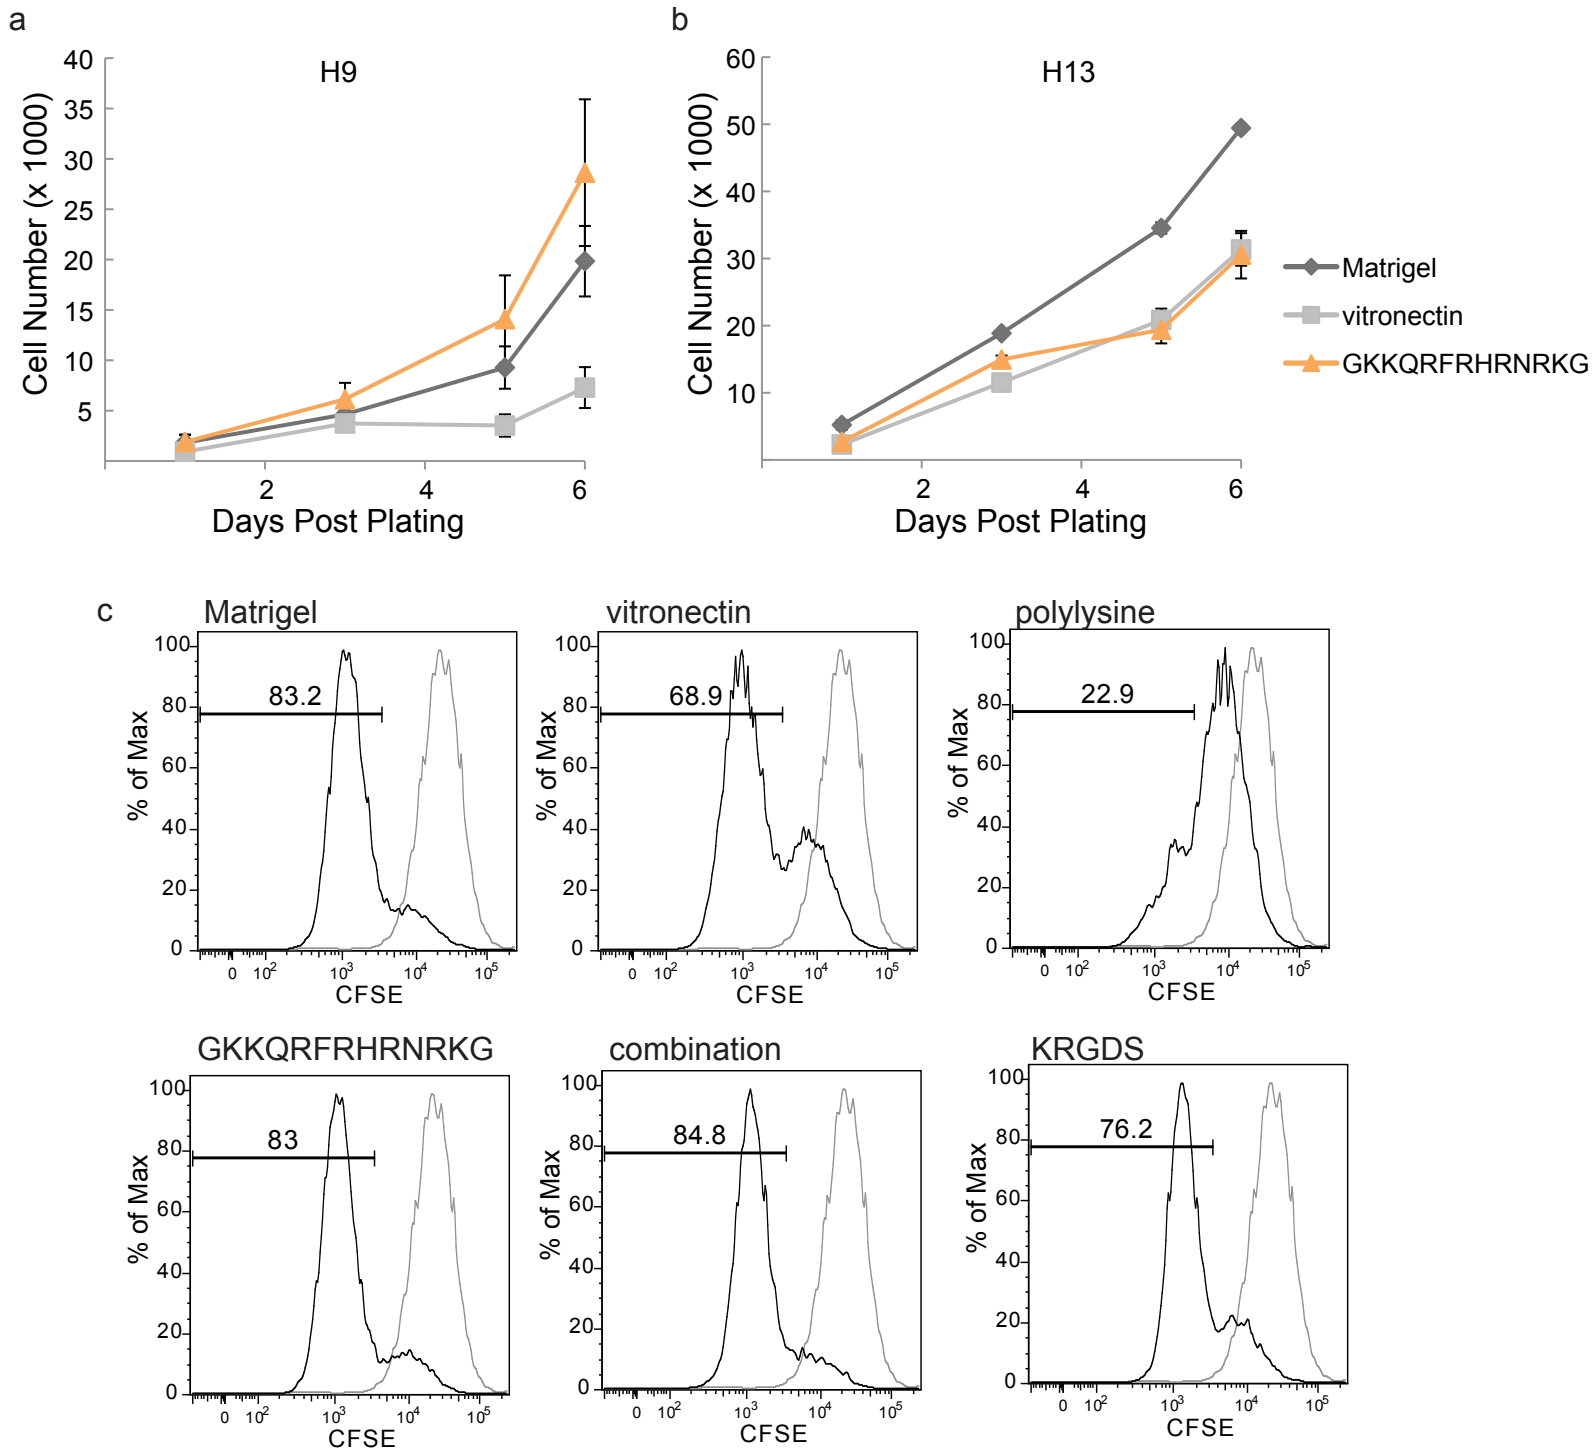

**Supplementary Figure 3.** Growth characteristics of hES cells cultured on natural and synthetic substrata. (a-b) Growth curves for the second passage of hES cells (H9, a, and H13, b) cultured on Matrigel, vitronectin, or GKKQFRHRNRKG in mTeSR media supplemented with 5  $\mu$ M ROCK inhibitor. For each time point, cell counts are reported from triplicate wells. Cell counts were determined using a standard curve generated with the Cell Counting Kit-8 (Dojindo), which allows for the colorimetric detection of viable cells in culture based on their dehydrogenase activity. Culturing cells on Matrigel, vitronectin, or surfaces presenting the heparin-binding peptide GKKQFRHRNRKG afforded an increase in the number of cells. (c) Cell division analysis using the fluorescent cell staining dye, carboxyfluoresceindiacetate (CFSE). Human ES cells (H9) were labeled with CFSE, which allows for cell divisions to be monitored by a decrease in fluorescence. After labeling, cells were either immediately fixed for later analysis or distributed to the indicated surfaces. After 72 hours of culture in mTeSR media supplemented with 5  $\mu$ M ROCK inhibitor, cells were analyzed using flow cytometry. The gray lines represent the parent population, and the black lines represent the cells cultured on the various surfaces. A gate was drawn between two discreet populations of cells to compare cell divisions on the indicated surfaces. The numbers indicate the percentage of cells in the population with lower fluorescence.

**Supplementary Figure 4.** Cells cultured on RGD presenting surfaces differentiate into a variety of cell types.

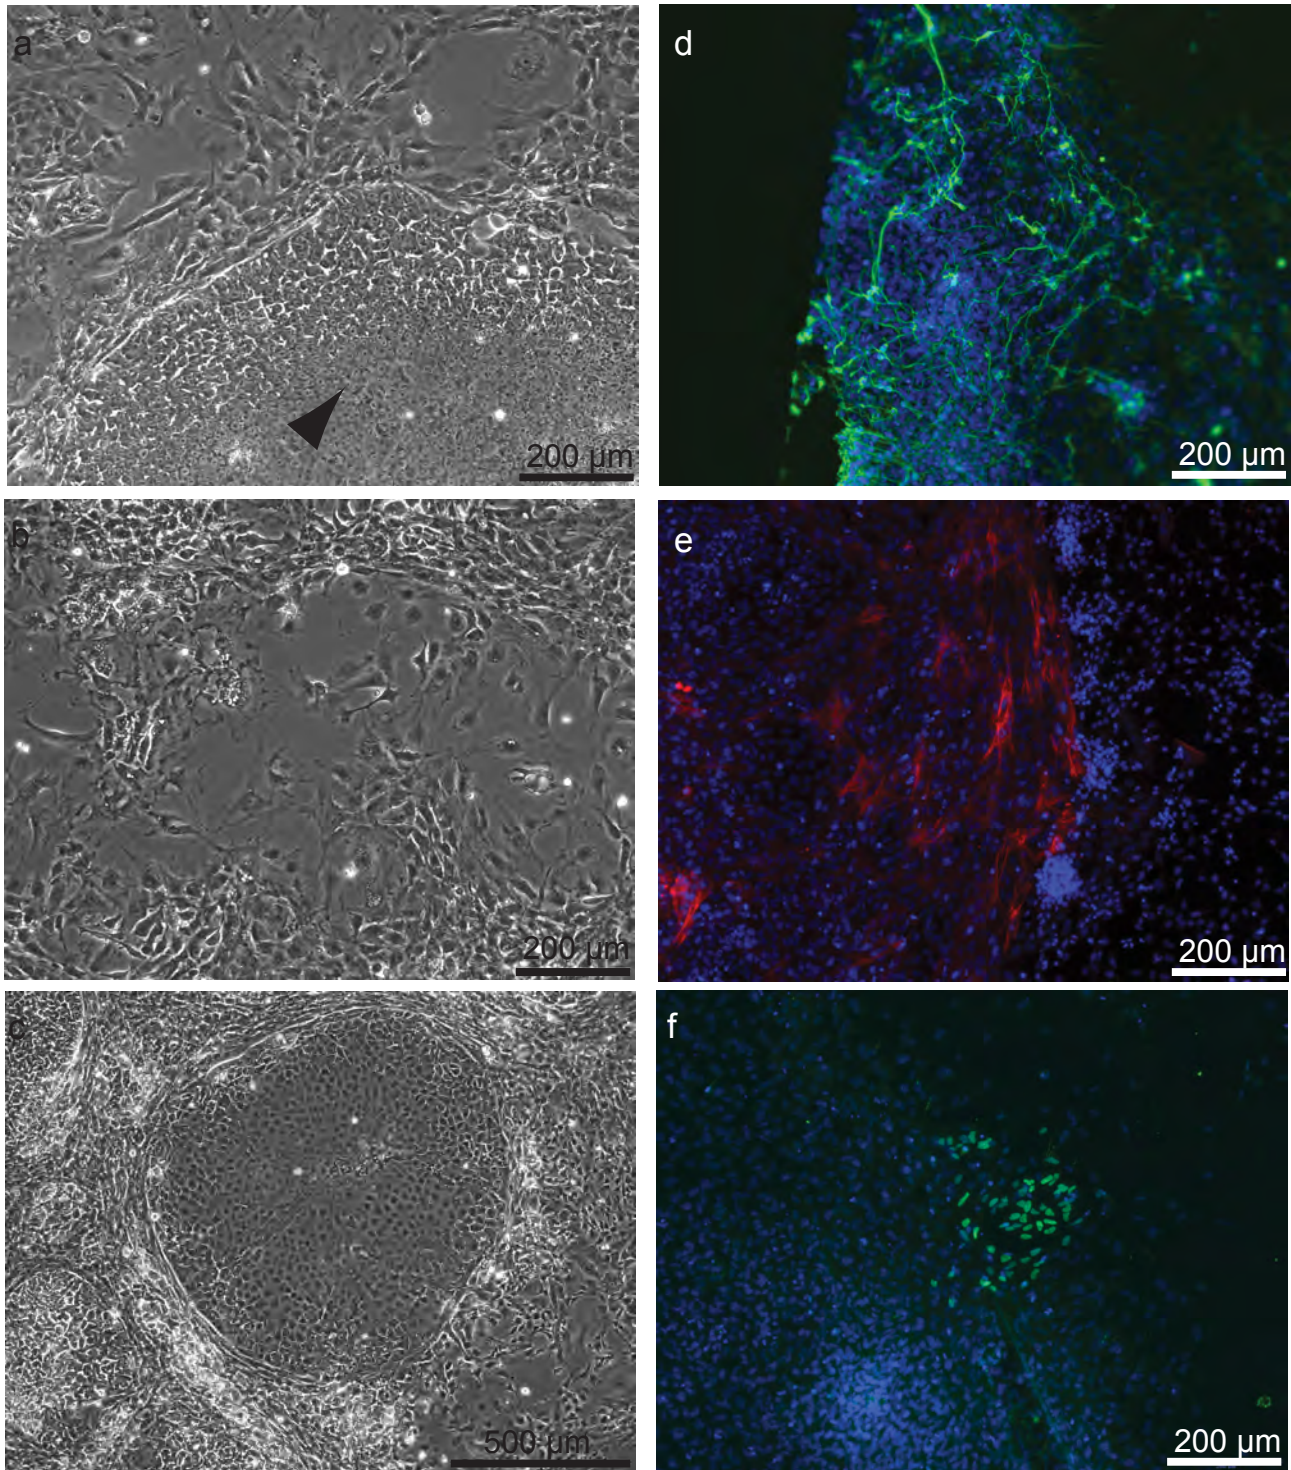

**Supplementary Figure 4.** Cells cultured on RGD presenting surfaces differentiate into a variety of cell types. (a-c) Human ES cells (H1) were cultured in mTeSR + Ri on synthetic surfaces presenting the integrin binding peptide KGRGDS for 15 days. In addition to the undifferentiated cell morphology (a, arrowhead), a variety of cell morphologies was observed. (d-f) Human ES cells (H7) were cultured in mTeSR + Ri on synthetic surfaces presenting the integrin binding peptide KGRGDS for 22 days and then immunostained for markers of differentiation. Immunoreactivity for  $\beta$ -III tubulin (d),  $\alpha$ -smooth muscle actin (e), and FoxA2 (f) indicate the presence of ectoderm, mesoderm, and endoderm, respectively.

**Supplementary Figure 5. Human ES cells cultured long-term on a synthetic surface maintain markers of pluripotency.**

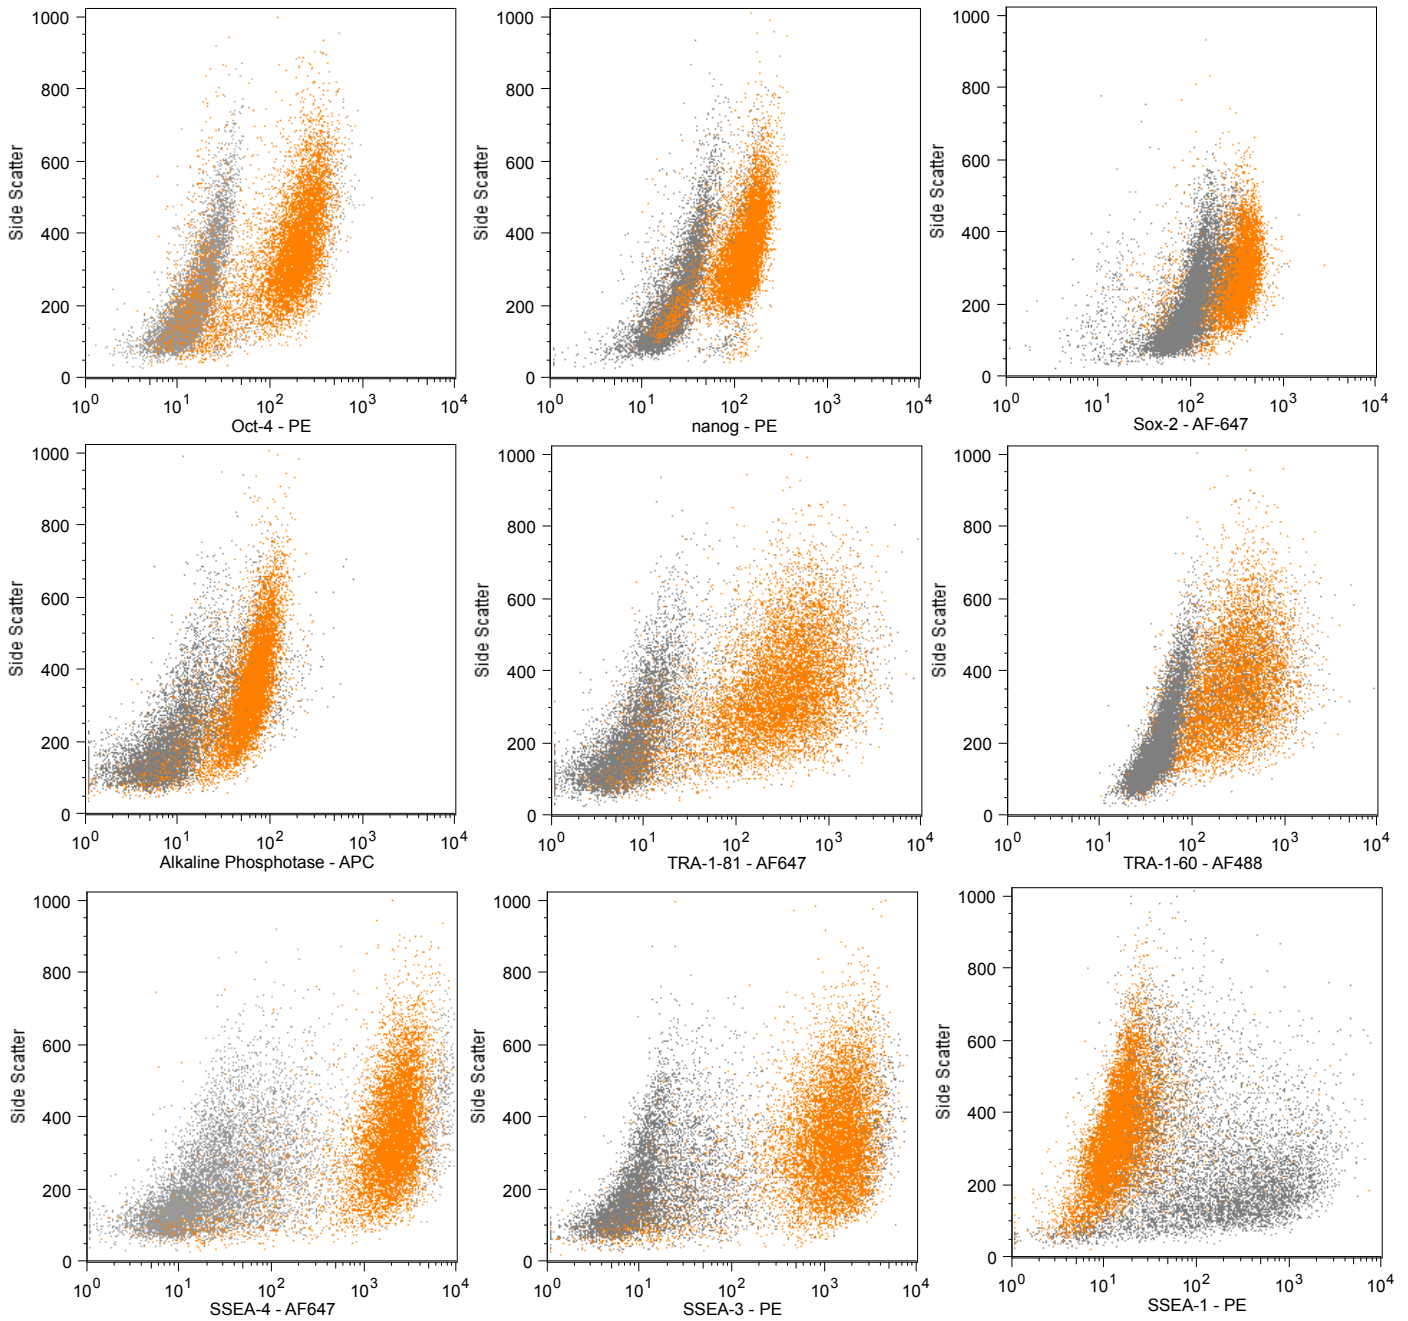

**Supplementary Figure 5. Human ES cells cultured long-term on a synthetic surface maintain markers of pluripotency.** (f) After three months (16 passages), cells (H14) cultured in mTeSR + Rock inhibitor (Ri) on a surface displaying the peptide GKKQRFHRNRKG were analyzed by flow cytometry for markers of pluripotency. For comparison, differentiated cells were stained to serve as a biological negative. A biological negative is superior to an isotype control since their background staining will depend upon their specificity, concentration, degree of aggregation, and fluorophore:antibody ratio. Compared to differentiated cells (gray dot plots), cells cultured on the synthetic surface (orange dot plots) maintained high levels of markers of pluripotency and low levels of the marker of differentiation SSEA-1.

**Supplementary Figure 6.** Gene expression differences between hES cells cultured on defined surfaces presenting GKKQFRHRNRKG and cells cultured on Matrigel.

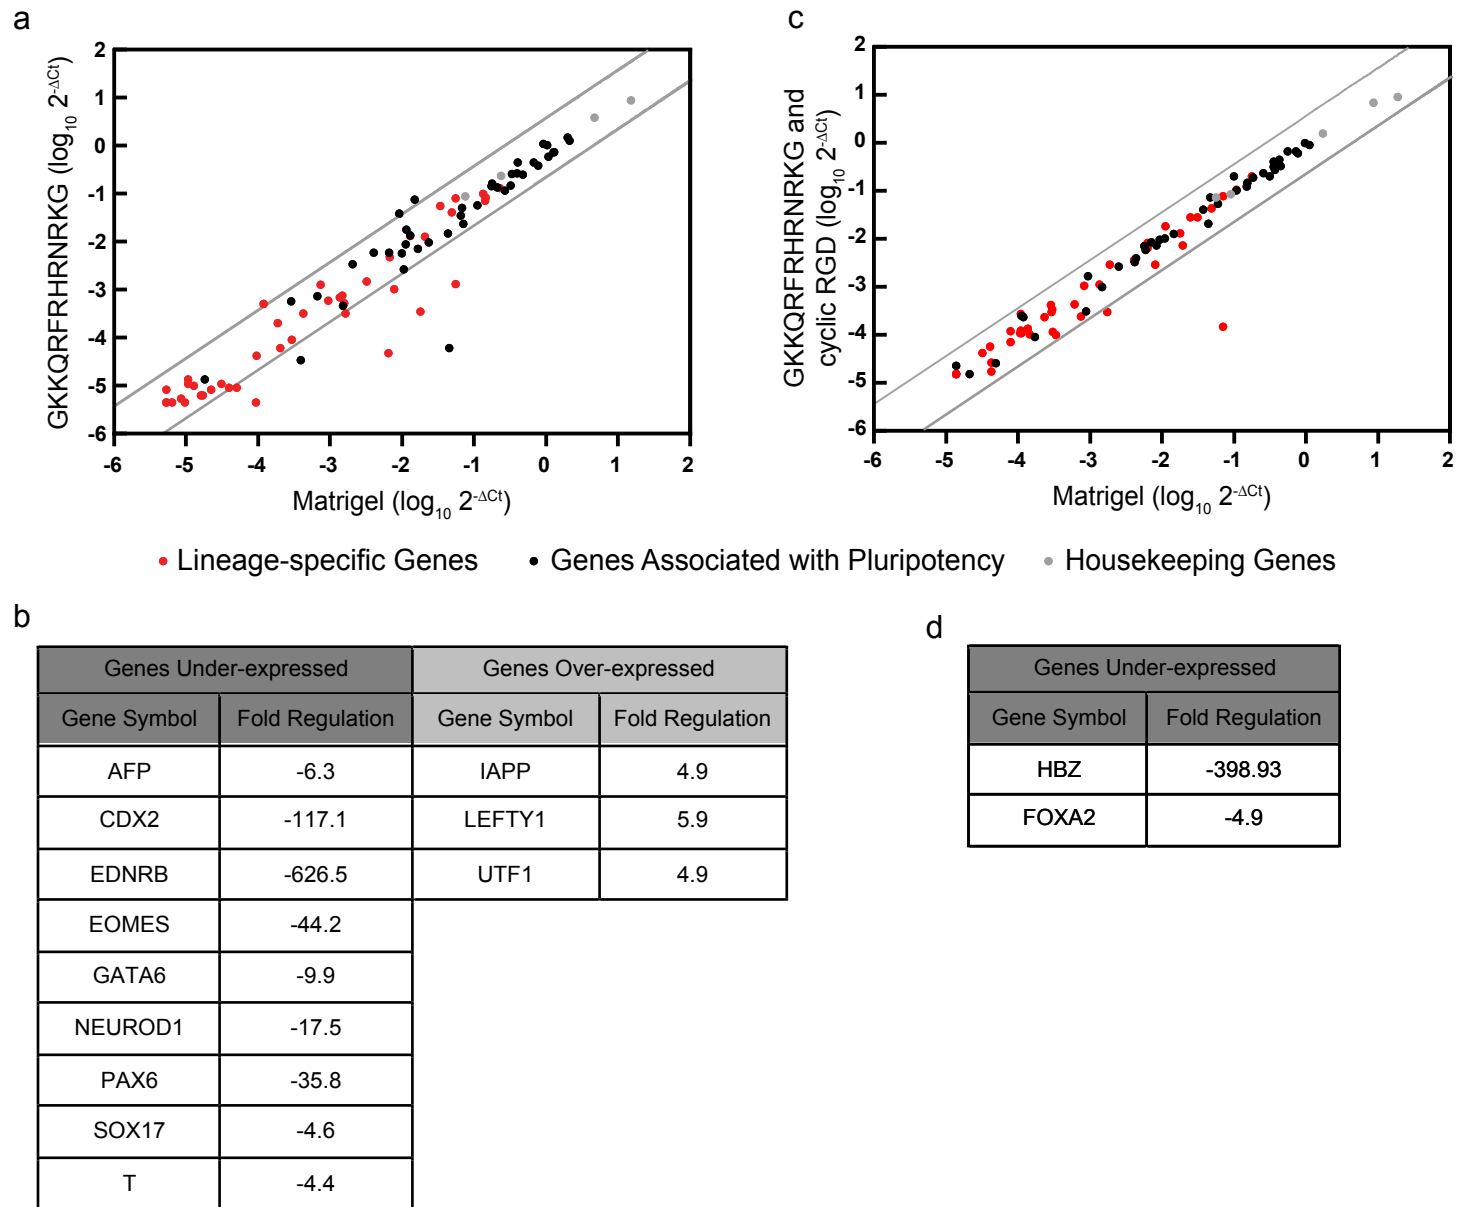

**Supplementary Figure 6.** Gene expression differences between hES cells cultured on defined surfaces presenting GKKQFRHRNRKG and cells cultured on Matrigel. (a-b) Total RNA from hES cells (H9) cultured long-term in mTeSR + Ri on SAM surfaces presenting the peptide GKKQFRHRNRKG or Matrigel was characterized using the human embryonic stem cell RT2 Profiler PCR array. Data represents the average of two technical replicates. (a) The relative expression levels for each gene in the two samples are plotted against each other in the scatter plot. The majority of genes including the markers of pluripotency (black dots) are expressed at similar levels between the two samples (gray lines represent a four-fold change). (b) Genes expression differences (> 4 fold) are listed in the table. These genes are typically associated with differentiation (AFP, CDX2, EOMES, NEUROD1, PAX6, SOX17, and T). These data suggest that the population of cells cultured on our simple, synthetic surfaces is more homogenous with fewer differentiated cells than the population cultured on Matrigel. (c-d) Total RNA from hES cells (SA02) cultured for 1 month in mTeSR on streptavidin-coated surfaces presenting the peptide GKKQFRHRNRKG and cyclic RGD or Matrigel was characterized using the human embryonic stem cell RT2 Profiler PCR array. (c) The relative expression levels for each gene in the two samples are plotted against each other in the scatter plot. The majority of genes including the markers of pluripotency (black dots) are expressed at similar levels between the two samples (gray lines represent a four-fold change). (d) Genes expression differences (> 4 fold) are listed in the table.

**Supplementary Figure 7.** Human pluripotent stem cells cultured on surfaces presenting GKKQRHRNRKG maintain a normal karyotype.

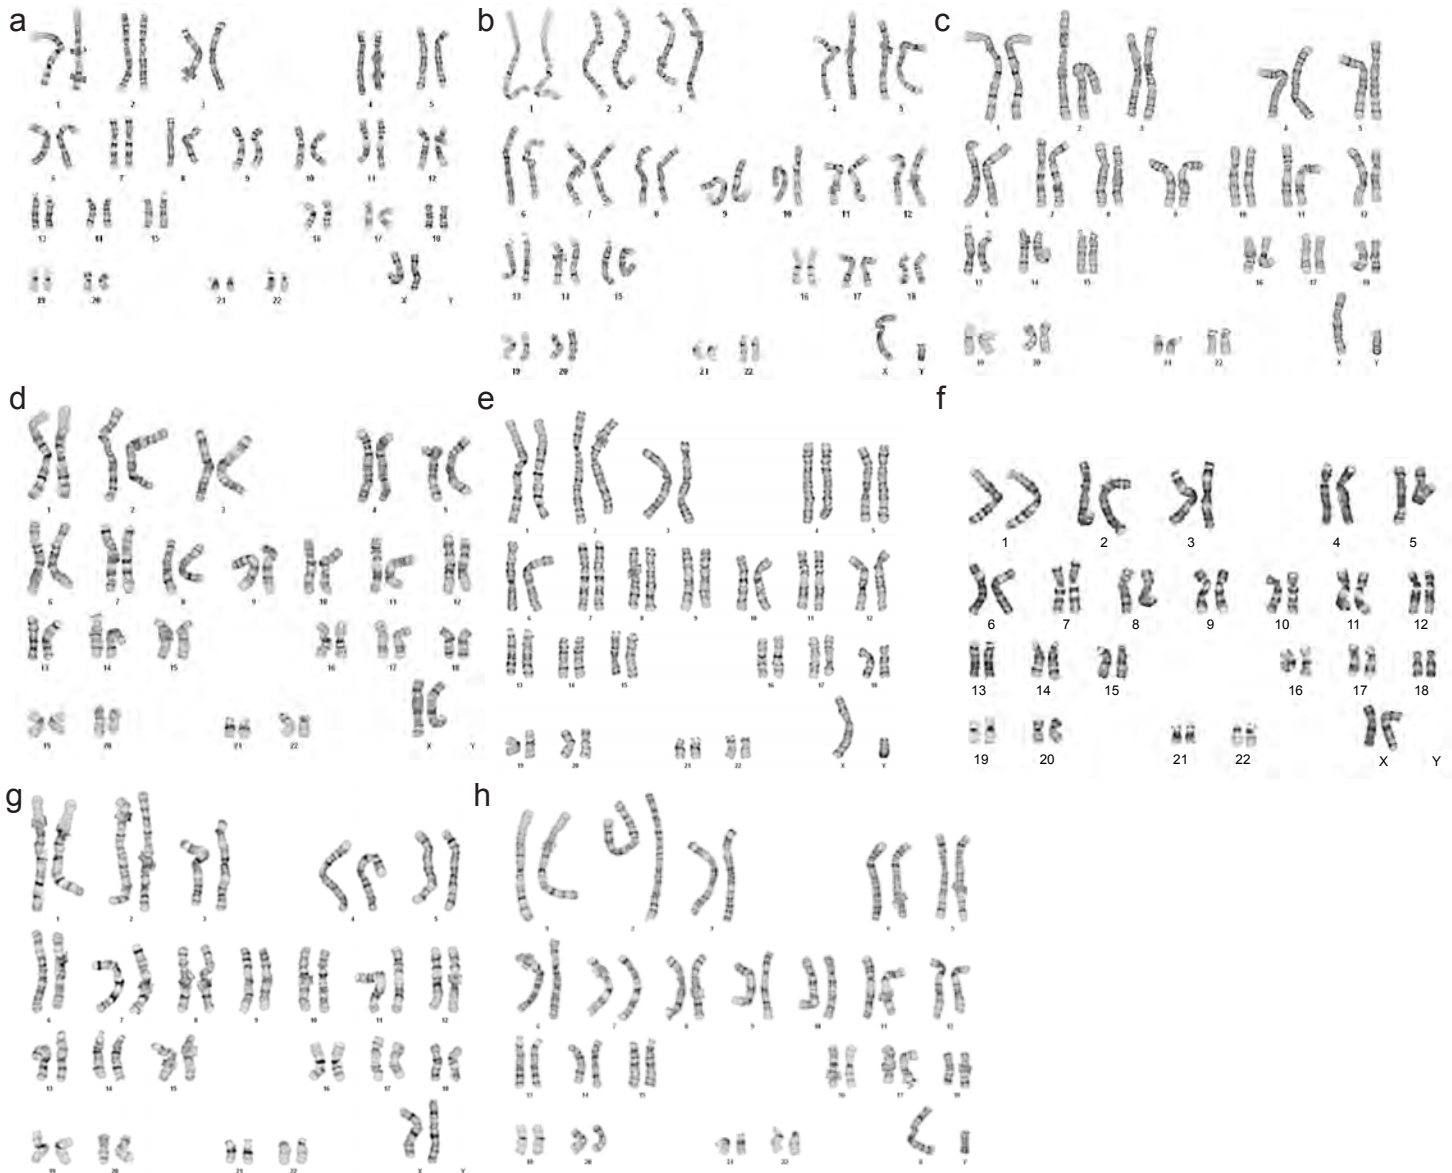

**Supplementary Figure 7.** Human pluripotent stem cells cultured on surfaces presenting GKKQRHRNRKG maintain a normal karyotype. (a) The karyotype of human ES cells (H7) cultured in mTeSR + Ri on SAMs displaying the peptide GKKQRFHRNRKG for 1 month (6 passages) was analyzed by standard G banding. (b) Karyotype of human ES cells (H1) cultured in mTeSR + Ri on SAMs displaying the peptide GKKQRFHRNRKG for 1 month (6 passages) was determined by standard G banding. (c) Karyotype of human ES cells (H13) cultured in mTeSR + Ri on SAMs displaying the peptide GKKQRFHRNRKG for 2 months (14 passages) as determined by standard G banding. (d) Karyotype of induced pluripotent stem cells (IMR-90-1) cultured in mTeSR + Ri on SAMs displaying the peptide GKKQRFHRNRKG for 1 month (7 passages) as determined by standard G banding. (e) No clonal abnormalities were detected by standard G banding for human ES cells (H14) cultured in mTeSR + Ri on surfaces displaying the peptide GKKQRFHRNRKG for 3 months (20 passages). After multiple cryopreservations however, one out of forty cells examined had three copies of chromosome 17. Trisomy 17 is a recurrent clonal abnormality in human ES cells. (f) Karyotype of human ES cells (H9) cultured in mTeSR + Ri on SAMs displaying the peptide GKKQRFHRNRKG for 3 months (17 passages) as determined by standard G banding. (g) Karyotype of human ES cells (H9) cultured in mTeSR on streptavidin-coated surfaces displaying a combination of GKKQRFHRNRKG and cyclic RGD for 2 months as determined by standard G banding. (h) Karyotype of human ES cells (H14) cultured in mTeSR on streptavidin-coated surfaces displaying a combination of GKKQRFHRNRKG and cyclic RGD for 1 month as determined by standard G banding.

**Supplementary Figure 8. Pluripotent stem cells cultured on a synthetic surface maintain the ability to differentiate into many different cell types.**

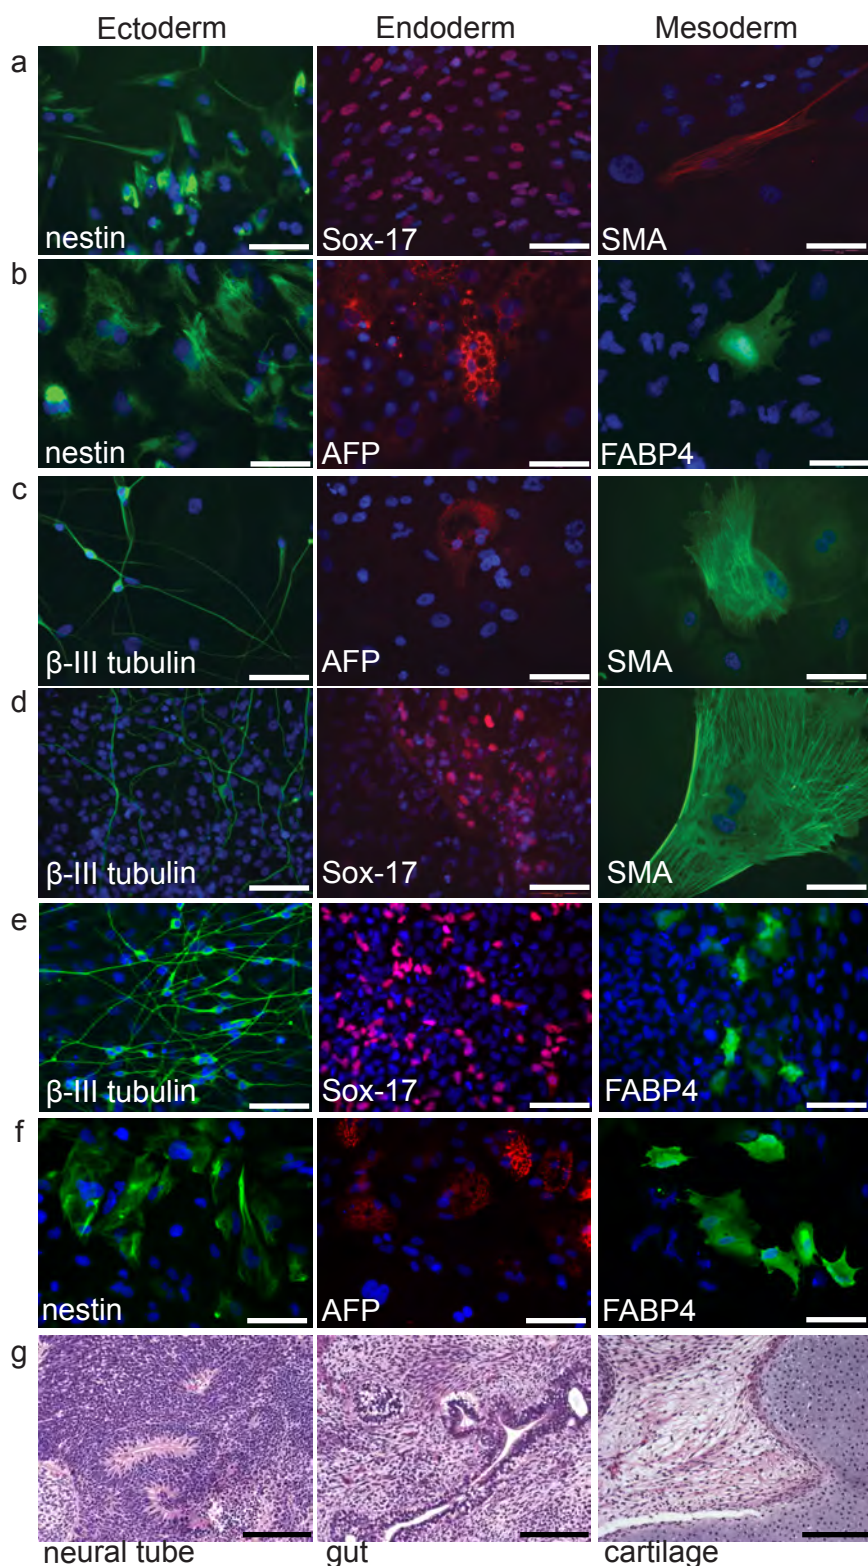

**Supplementary Figure 8.** Differentiation of pluripotent stem cells cultured on synthetic surfaces. (a-f) In vitro differentiation assay results. Differentiated cells were stained for markers of ectoderm ( $\beta$ -III tubulin, nestin), endoderm (Sox17, AFP), and mesoderm (SMA, FABP-4) and counterstained with DAPI (blue). (a) Results from H1 cells maintained for 1 month in mTeSR + Ri on SAMs presenting the heparin-binding peptide GKKQFRHRNRKG. (b) Results from H7 cells cultured for 1 month in mTeSR + Ri on SAMs presenting the heparin-binding peptide GKKQFRHRNRKG. (c) Results from iPS cells (IMR-90-1) maintained in mTeSR + Ri on SAMs presenting the heparin-binding peptide GKKQFRHRNRKG for 1 month. (d) Results from H13 cells maintained in mTeSR + Ri on SAMs presenting the heparin-binding peptide GKKQFRHRNRKG for 2 months. (e) Results from H14 cells maintained in mTeSR + Ri on SAMs presenting the heparin-binding peptide GKKQFRHRNRKG for 3 months. (f) Results from H9 cells maintained in mTeSR + Ri on SAMs presenting the heparin-binding peptide GKKQFRHRNRKG for 3 months. Scale bars, 100  $\mu$ m. (g) Teratoma formation assay for H1 cells maintained in mTeSR + Ri on SAMs presenting the heparin-binding peptide GKKQFRHRNRKG for 1 month (6 passages). Teratomas contained a mixture of tissues resembling the neural tube, the gut, and cartilage. Scale bars, 200  $\mu$ m.



**Supplementary Figure 9. Human ES cells cultured long-term on surfaces presenting GKKQRFRRHRNRKG can be directed to differentiate into each of the primary germ layers.**

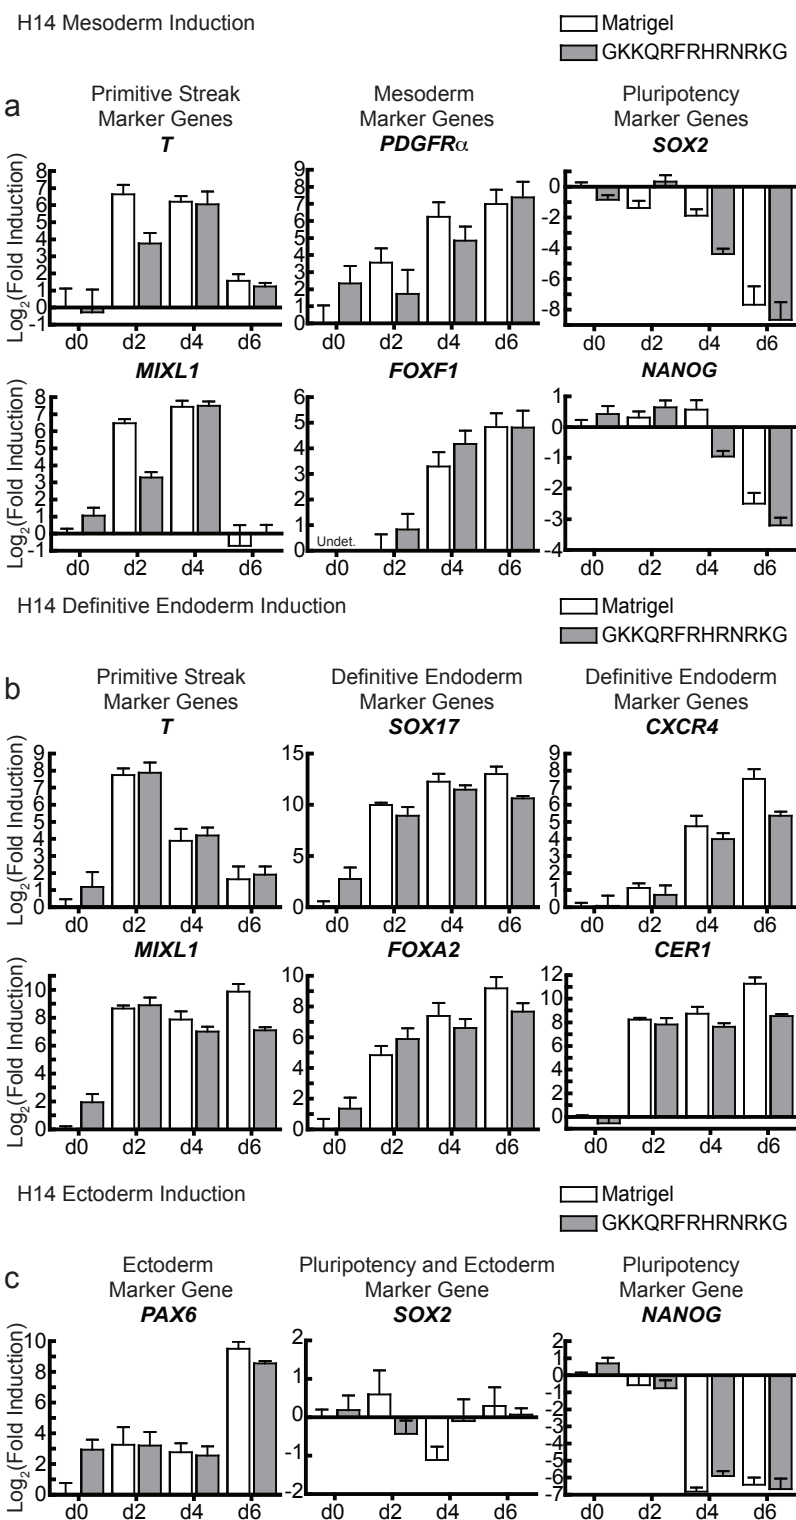

**Supplementary Figure 9.** Human ES cells cultured long-term on surfaces presenting GKKQRFRRHRNRKG can be directed to differentiate into each of the primary germ layers. (a) To induce mesoderm differentiation, cells (H14) were treated with Activin A for 1 day followed by BMP-4 for 5 days. Markers of the primitive streak (*T* and *MIXL1*) showed transient activation from day 2 to 4. Expression of mesoderm markers (*PDGFR $\alpha$*  and *FOXF1*) increased through day 6, and pluripotency markers (*SOX2* and *NANOG*) decreased. (b) To induce definitive endoderm differentiation, cells were treated for 6 days with Activin A. Expression of markers of the primitive streak (*T* and *MIXL1*) increased beginning on day 2. Expression of definitive endoderm markers (*SOX17*, *FOXA2*, *CXCR4*, and *CER1*) increased steadily beginning on day 2 or day 4. (c) To induce ectoderm differentiation, cells were treated with SB431542 and Noggin for 6 days to inhibit SMAD signaling. A marker for ectoderm (*PAX6*) was induced on day 6. A marker for pluripotency (*NANOG*) decreased beginning day 4. Cells continued to express *SOX2*, a marker common to both ectoderm and pluripotent cells. For each differentiation protocol, cells cultured long-term on GKKQRFRRHRNRKG responded similarly to those cultured on Matrigel. Gene expression was analyzed via RT-qPCR, and error bars represent the standard deviation of triplicate reactions.

**Supplementary Figure 10. Presentation of the heparin-binding peptide GKKQRFRRHRNRKG on a variety of materials provides substances that can support pluripotent stem cell propagation.**

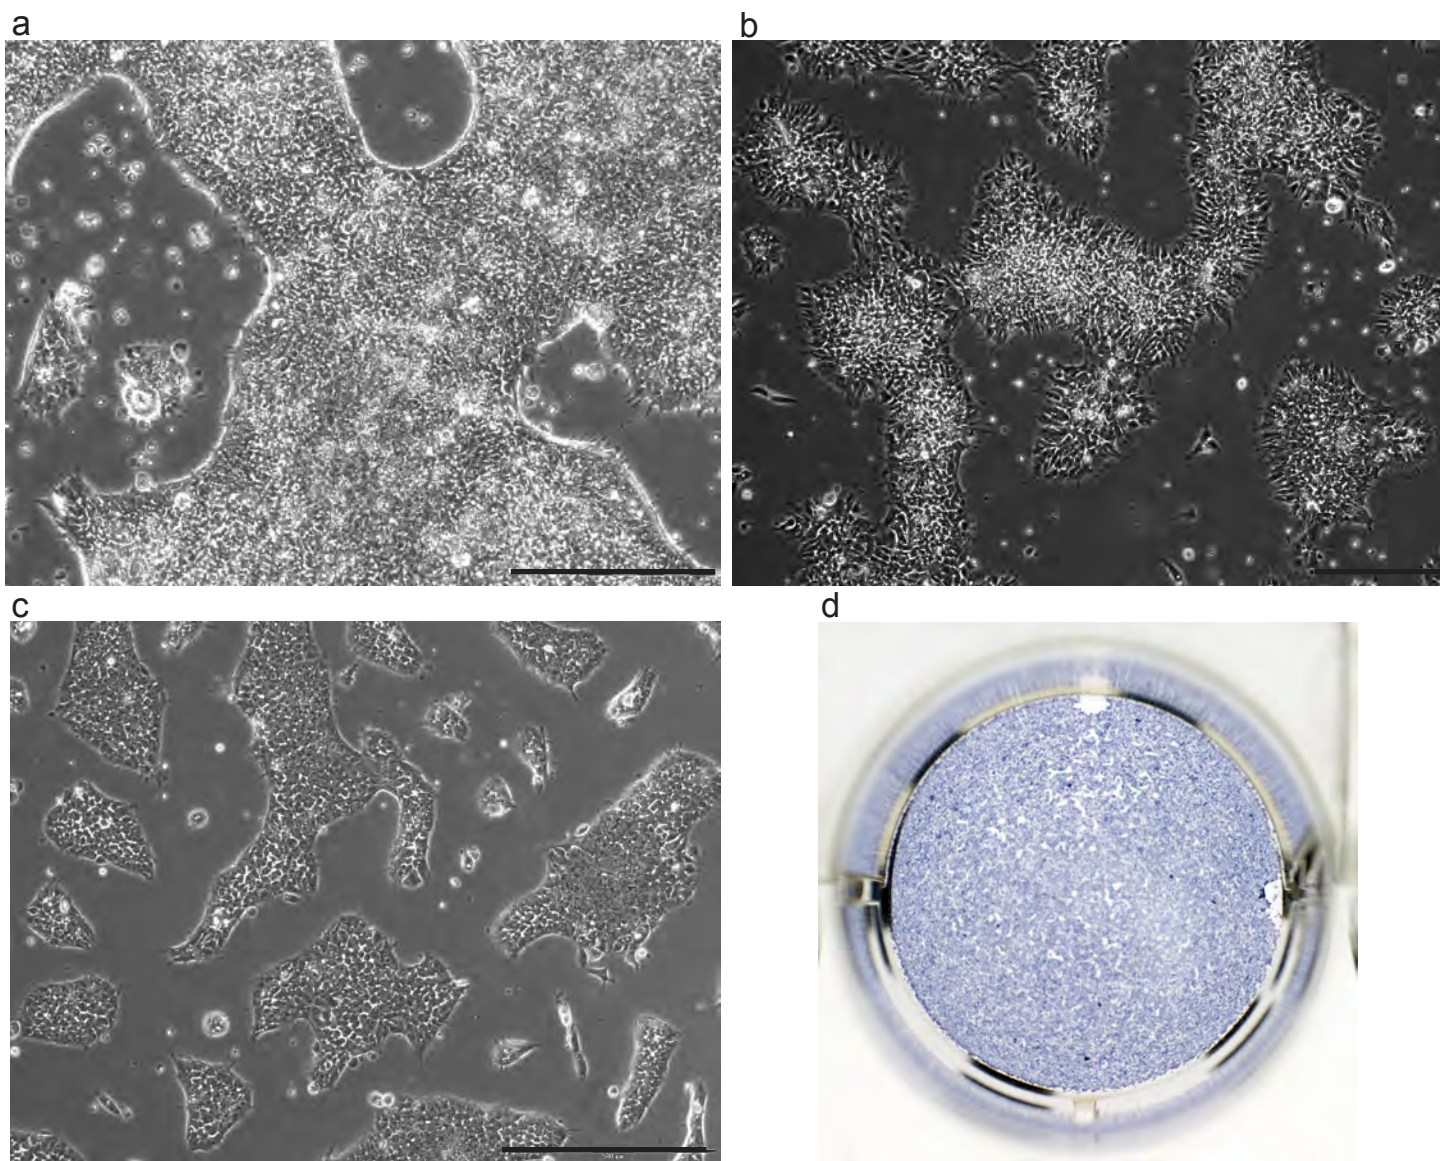

**Supplementary Figure 10.** Presentation of the heparin-binding peptide GKKQRFRRHRNRKG on a variety of materials provides substances that can support pluripotent stem cell propagation. (a-b) Human ES cells (H9, a, H7, b) cultured (H9-12 days, H7-4 days) in mTeSR + Ri on surfaces generated by coupling CGKKQRFRRHRNRKG to activated glass coverslips. (c) Induced pluripotent stem cells (IMR-90-1) cultured (8 days) on streptavidin-coated surfaces presenting biotinylated GKKQRFRRHRNRKG. (d) Alkaline phosphatase staining (Vector Labs) for iPS cells (DF19-9 Clone 7T) cultured for three passages in mTeSR + Ri on streptavidin-coated surfaces presenting biotinylated GKKQRFRRHRNRKG. Image represents one well of a 12-well plate. Scale bars, 200  $\mu\text{m}$ , (a,c), 500  $\mu\text{m}$ , (b). Streptavidin-coated surfaces presenting biotinylated peptides represent a versatile method for fabricating pluripotent stem cell culture surfaces of any size.

**Supplementary Figure 11. Comparison of surfaces presenting cyclic RGD to those presenting GAG-binding peptides.**

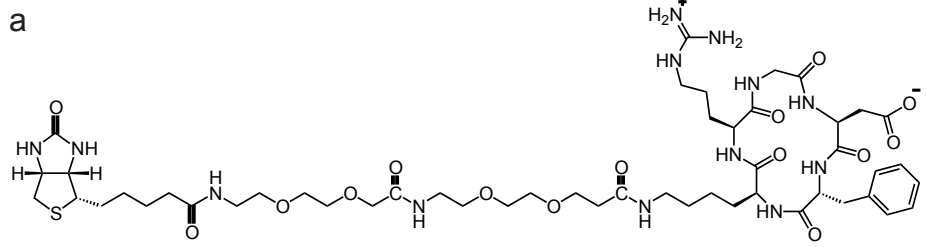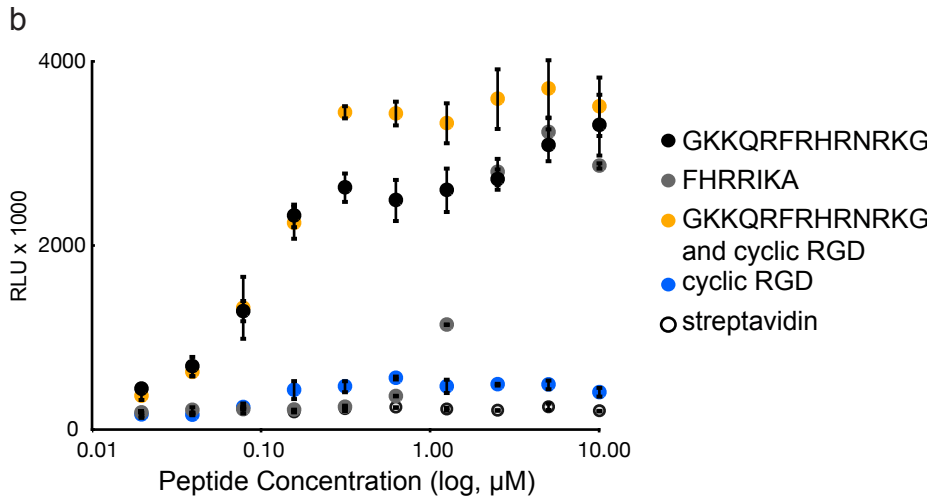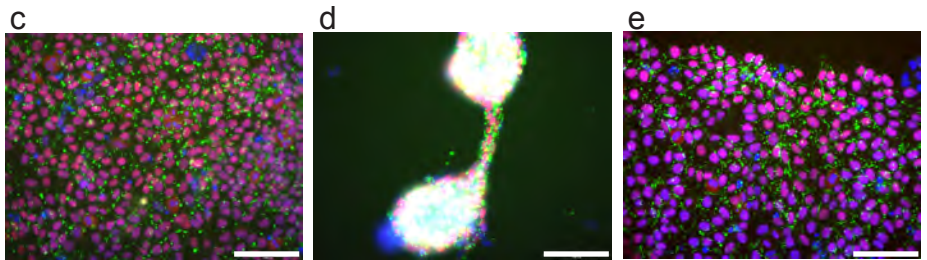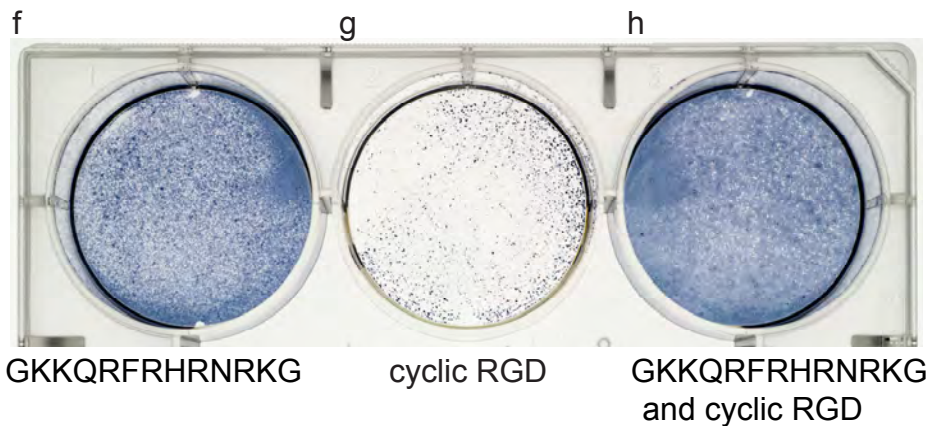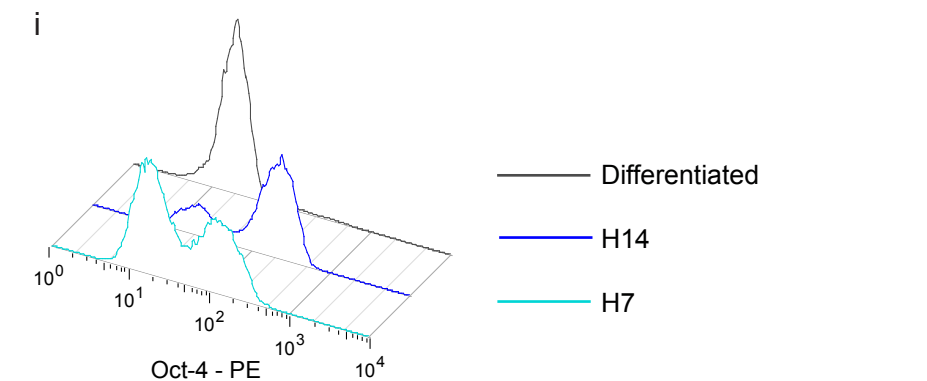

**Supplementary Figure 11.** Comparison of surfaces presenting cyclic RGD to those presenting GAG-binding peptides. (a) Structure of biotinylated cyclic RGD (Peptides International). (b) The effect of peptide concentration on hES cell adhesion. Human ES cells (H7) were dissociated using an enzyme-free buffer. Cells were seeded in mTeSR + Ri on to streptavidin-coated surfaces presenting biotinylated peptides. After 12 h, surfaces were washed and the cells were lysed. The cell lysate was used to approximate the cell number using Cell Titer Glo (Promega). Surfaces presenting the peptide GKKQRFRRHRNRKG supported adhesion of the greatest number of cells and at concentrations lower than the other peptides tested. Error bars represent the average relative luminescence units of triplicate wells  $\pm$  the standard deviation. (c-h) Human ES cells (SA02) grown on streptavidin-coated surfaces presenting biotinylated GKKQRFRRHRNRKG (c,f), cyclic RGD (d,g), or a 7:3 combination of the two peptides (e,h) in mTeSR + Ri. After the formation of colonies, Y-27632 was removed. After 2 days, cells were immunostained for Oct-4 (green), SSEA-4 (red), and counterstained with DAPI (blue) (c-e), or stained for alkaline phosphatase (f-h). Cells cultured on surfaces presenting GAG-binding peptides (c,e,f,h). Cells cultured on cyclic RGD alone form loosely bound, multilayered aggregates that detach in the absence of Ri (d,g). Scale bars, 100  $\mu\text{m}$  (c-e). (i) Human ES cells (H7 and H14) cultured on streptavidin-coated surfaces presenting cyclic RGD for 3 passages (21 days) in mTeSR media supplemented with 5  $\mu\text{M}$  Y-27632 were stained for Oct-4 and analyzed by flow cytometry. On surfaces presenting cyclic RGD, most H14 cells maintained Oct-4 levels (77% positive) but the H7 cell line showed substantially decreased levels of Oct-4 (43% positive).

**Supplementary Table 1. Collection of bioactive peptides.**

| Peptide Sequence       | Origin                   | Ref.          | Observations                                                                         |
|------------------------|--------------------------|---------------|--------------------------------------------------------------------------------------|
| GGGEVYVVAENQQGKSKA     | NCAM                     | 1             | Able to support hES cell adhesion but not self-renewal. Cannot replace soluble bFGF. |
| KIPKASSVPTELSAISTLYL   | BMP-2                    | 2             | Inconsistent adhesion and unable to support hES cell self-renewal                    |
| LSSKMYHTKGQEGSVSLRSSD  | Dkk-1                    | 3             | Inconsistent adhesion                                                                |
| ADSQLIHGGLRS           | Phage Display            | 4             | Unable to support hES cell adhesion                                                  |
| MHRMPSFLPTTL           | Phage Display            | (unpublished) | Inconsistent adhesion. Cannot replace soluble TGF $\beta$ .                          |
| INPISGQ                | N-cadherin               | 5             | Unable to support hES cell adhesion                                                  |
| GSQIYALCNQFYTPAATGLYVD | Occludin                 | 6             | Unable to support hES cell adhesion                                                  |
| ATYTLFSHAVSSNGNAV      | E-cadherin               | 7             | Inconsistent adhesion and unable to support hES cell self-renewal                    |
| GGSTVHEILSKLSLEG       | Annexin                  | 8             | Unable to support hES cell adhesion                                                  |
| GGGKHIFSDDSSE          | Combinatorial Chemistry  | 9             | Unable to support hES cell adhesion                                                  |
| KPHSRN                 | Fibronectin              | 10            | Able to support hES cell adhesion but not self-renewal                               |
| GKKQRFRRHRNRKG         | Vitronectin              | 11            | Able to support hES cell adhesion and self-renewal                                   |
| GWQPPRARI              | Fibronectin              | 12            | Able to support hES cell adhesion and self-renewal                                   |
| GGPEILDVPST            | Fibronectin              | 13            | Unable to support hES cell adhesion                                                  |
| GSDPGYIGSR             | Laminin                  | 14            | Inconsistent adhesion and unable to support hES cell self-renewal                    |
| FHRRIKA                | Bone Sialoprotein        | 15            | Able to support hES cell adhesion and self-renewal                                   |
| KGRGDS                 | Fibronectin, Vitronectin | 16            | Able to support hES cell adhesion but not self-renewal                               |
| GGIKVAV                | Laminin                  | 17            | Unable to support hES cell adhesion                                                  |

**Supplementary Table 1.** Collection of bioactive peptides. Specifically, we chose to display peptides that were developed to mimic soluble signaling factors, mediate cell—cell interactions, or reside in other key ECM proteins. Alkanethiols displaying peptides with reported bioactivity were synthesized and used to form SAMs. Some amino acids were added or changed from original publications to provide additional distance from the surface, remove cysteines that could

interfere with peptide presentation, or to match the corresponding human residues. The major criteria for the screen was to identify peptides that could support hES cell adhesion. Combinations of peptides were tested, but no beneficial combinations were identified.

1. Kiryushko, D., *et al.* A synthetic peptide ligand of neural cell adhesion molecule (NCAM), C3d, promotes neuritogenesis and synaptogenesis and modulates presynaptic function in primary cultures of rat hippocampal neurons. *J Biol Chem* **278**, 12325-12334 (2003).
2. Saito, A., Suzuki, Y., Ogata, S., Ohtsuki, C. & Tanihara, M. Activation of osteo-progenitor cells by a novel synthetic peptide derived from the bone morphogenetic protein-2 knuckle epitope. *Biochim Biophys Acta* **1651**, 60-67 (2003).
3. Gregory, C.A., *et al.* Dkk-1-derived synthetic peptides and lithium chloride for the control and recovery of adult stem cells from bone marrow. *J Biol Chem* **280**, 2309-2323 (2005).
4. Chuman, Y., *et al.* Identification of a peptide binding motif for secreted frizzled-related protein-1. *Peptides* **25**, 1831-1838 (2004).
5. Williams, E.J., Williams, G., Gour, B., Blaschuk, O. & Doherty, P. INP, a novel N-cadherin antagonist targeted to the amino acids that flank the HAV motif. *Mol Cell Neurosci* **15**, 456-464 (2000).
6. Vietor, I., Bader, T., Paiha, K. & Huber, L.A. Perturbation of the tight junction permeability barrier by occludin loop peptides activates beta-catenin/TCF/LEF-mediated transcription. *EMBO Rep* **2**, 306-312 (2001).
7. Tang, L., Hung, C.P. & Schuman, E.M. A role for the cadherin family of cell adhesion molecules in hippocampal long-term potentiation. *Neuron* **20**, 1165-1175 (1998).
8. Becker, T., Weber, K. & Johnsson, N. Protein-protein recognition via short amphiphilic helices; a mutational analysis of the binding site of annexin II for p11. *EMBO J* **9**, 4207-4213 (1990).
9. Rønn, L.C., *et al.* Identification of a neuritogenic ligand of the neural cell adhesion molecule using a combinatorial library of synthetic peptides. *Nat Biotechnol* **17**, 1000-1005 (1999).
10. Aota, S., Nomizu, M. & Yamada, K.M. The short amino acid sequence Pro-His-Ser-Arg-Asn in human fibronectin enhances cell-adhesive function. *J Biol Chem* **269**, 24756-24761 (1994).
11. Vogel, B.E., *et al.* A novel integrin specificity exemplified by binding of the alpha v beta 5 integrin to the basic domain of the HIV Tat protein and vitronectin. *J Cell Biol* **121**, 461-468 (1993).
12. Woods, A., McCarthy, J.B., Furcht, L.T. & Couchman, J.R. A synthetic peptide from the COOH-terminal heparin-binding domain of fibronectin promotes focal adhesion formation. *Mol Biol Cell* **4**, 605-613 (1993).
13. Mould, A.P. & Humphries, M.J. Identification of a novel recognition sequence for the integrin alpha 4 beta 1 in the COOH-terminal heparin-binding domain of fibronectin. *EMBO J* **10**, 4089-4095 (1991).

14. Graf, J., *et al.* A pentapeptide from the laminin B1 chain mediates cell adhesion and binds the 67,000 laminin receptor. *Biochemistry* **26**, 6896-6900 (1987).
15. Rezania, A. & Healy, K.E. Biomimetic peptide surfaces that regulate adhesion, spreading, cytoskeletal organization, and mineralization of the matrix deposited by osteoblast-like cells. *Biotechnol Prog* **15**, 19-32 (1999).
16. Pierschbacher, M.D. & Ruoslahti, E. Cell attachment activity of fibronectin can be duplicated by small synthetic fragments of the molecule. *Nature* **309**, 30-33 (1984).
17. Tashiro, K., *et al.* A synthetic peptide containing the IKVAV sequence from the A chain of laminin mediates cell attachment, migration, and neurite outgrowth. *J Biol Chem* **264**, 16174-16182 (1989).

**Supplementary Table 2. Primer sets used for quantitative real-time PCR analysis.**

| <b>Gene Symbol</b> | <b>Forward Primer (5'-3')</b> | <b>Reverse Primer (5'-3')</b> |
|--------------------|-------------------------------|-------------------------------|
| SRP72              | AGAAGACACTGATGGGACTGAG        | CTCCTCTGTTTCGACCCTGAAG        |
| T                  | TTTCAAAGCAGTGGAGGAGCACAC      | ACTGCATCATCTCCACAGTTGGGT      |
| MIXL1              | AACCTTTGGCTAGGCCGGAGATTA      | GCAGGCAGTTCACATCTACCTCAA      |
| PDGFR $\alpha$     | GCAAAGGCATCACAATGCTGG         | GCACATTCGTAATCTCCACTGTC       |
| FOXF1              | CGGCTTCCGAAGGAAATGC           | CAAGTGGCCGTTTCATCATGC         |
| SOX2               | GAGTGGAACCTTTTGTCCGAGA        | GAAGCGTGTACTTATCCTTCTTCAT     |
| NANOG              | CAGAAGGCCTCAGCACCTAC          | ATTGTTCCAGGTCTGGTTGC          |
| SOX17              | TATCTGCACTTCGTGTGCAAGCCT      | AGTGTGTAACACTGCTTCTGGCCT      |
| FOXA2              | GGGTGATTGCTGGTCGTTTGTGT       | GTCATGTACGTCTTCATGCCGTT       |
| CXCR4              | TACACCGAGGAAATGGGCTCA         | AGATGATGGAGTAGATGGTGGG        |
| CER1               | TCACTGTTTGCCTGCCAAGTTCAC      | AGCCAGCATGTAGGATGTGTCCAT      |
| PAX6               | GCCAGCTTCACCATGGCAAATAA       | ATCATAACTCCGCCATTACCCGA       |
| OCT4               | CAGTGCCCGAAACCCACAC           | GGAGACCCAGCAGCCTCAA           |
